# Supplementary material for: A TARP Syndrome Phenotype Is Associated with a Novel Splicing Variant in RBM10
Source: MDPI journal article supplement (doi:10.3390/genes13112154), 2022-11-18
Supplement: s1 [file s1]

### **Supplementary material**

**Supplementary Table S1.** Transcript variants of *RBM10* and the nucleotide position of the novel splice variant.

| <b>GenBank number</b> | <b>Number of exons (coding)</b> | <b>Transcript length (bp)</b> | <b>CDS</b> | <b>Start codon</b> | <b>Stop codon</b> | <b>Position of the splice site variant</b> |
|-----------------------|---------------------------------|-------------------------------|------------|--------------------|-------------------|--------------------------------------------|
| NM_152856 (tv2)       | 23 (22)                         | 2559                          | 391-2949   | exon 2             | exon 23           | c.17+1G>C                                  |
| NM_001204466 (tv3)    | 23 (22)                         | 2562                          | 391-2952   | exon 2             | exon 23           | c.17+1G>C                                  |
| NM_001204467 (tv4)    | 24 (23)                         | 2790                          | 391-3180   | exon 2             | exon 24           | c.17+1G>C                                  |
| NM_005676 (tv1)*      | 24 (23)                         | 2793                          | 391-3183   | exon 2             | exon 24           | c.17+1G>C                                  |
| NM_001204468 (tv5)    | 24 (24)                         | 2899                          | 227-3214   | exon 1             | exon 24           | c.212+1G>C                                 |

\* commonly used reference sequence for *RBM10*; tv – transcript variant.
